# Supplementary material for: Rational design of an electrochromic polymer with high contrast in the visible region: dibenzyl substituted poly( 3,4-propylenedioxythiophene)
Source: Royal Society of Chemistry journal article supplement (doi:10.1039/b108654e), 2001-10-12

**Supplementary Information**

Cyclic voltammograms of Polymer films in 0.1M tetrabutylammonium tetrafluoroborate (TBAFB) in acetonitrile (ACN); a) 100, b) 150, c) 200, d) 250 and e) 300 mV/s.


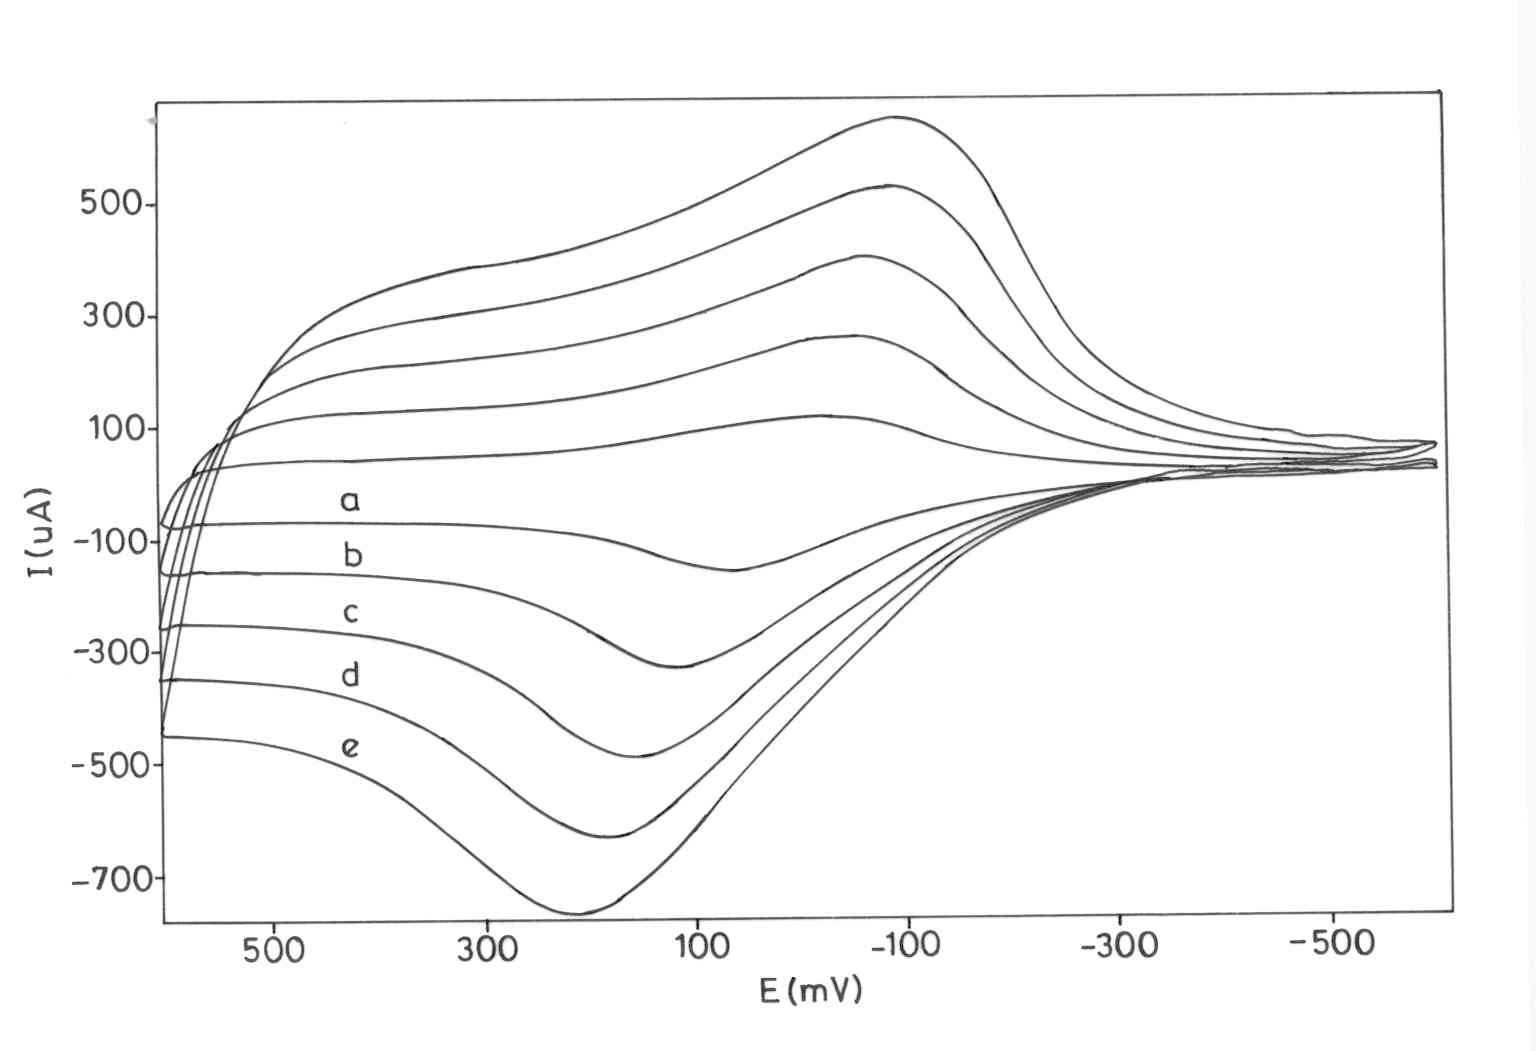

Supplement: b108654e.doc [file b108654e.doc]
